# Supplementary material
Source: publisher figshare collection journal article supplement (https://tandf.figshare.com/articles/dataset/_/9777914)
Supplement: Supplementary file 1 [file 2]

Archive with 5 entries (5 files):
- tsab_a_1649738_sm0129.pdf
- tsab_a_1649738_sm4577.pdf
- tsab_a_1649738_sm4572.pdf
- tsab_a_1649738_sm4569.xlsx
- tsab_a_1649738_sm4563.pdf
