# Supplementary material
Source: publisher figshare collection journal article supplement (https://tandf.figshare.com/articles/dataset/_/9777914)
Supplement: Supplementary file 1 [file 2 › tsab_a_1649738_sm4563.pdf]

## Supplementary File S1

### List of *Botrylloides giganteus* samples studied morphologically:

Italy: see Brunetti & Mastrototaro 2012

Senegal: slides of the National Muséum d'Histoire Naturelle, Paris: SI-2, Coll. I.F.A.N. 016; SI-4, Col I.F.A.N. 063; SI-3, Col I.F.A.N. 061;

Brazil, Espírito Santo: DZUP Botd-89, Botd-90, Botd-91 Pier Enseada Suá, Vitória 20°19'07"S 40°17'56"W, 05/12/2016, leg. Rosana Rocha; DZUP Botd-92, Botd-93 Pier Enseada Suá, Vitória 20°19'07"S 40°17'56"W, 30/04/2016, leg. Rosana Rocha;

Rio de Janeiro: DZUP STY-31, Farol Beach, Arraial do Cabo, 27°17'08"S 48°22'25"W, 28/07/2000, leg. Luciana Costa; DZUP BOTD-09, Meros Beach, Ilha Grande, 23°13'07"S 44°20'28"W, 01/07/2007, leg. Carvalho, Y.B.B.;

São Paulo: DZUP Botl-22, Cabelo Gordo de Fora Beach, São Sebastião, 23°49'42"S 45°25'22"W, 17/02/1985, leg. Rosana Rocha; DZUP STY 27, experimental panel, Cabelo Gordo de Dentro Beach, São Sebastião, 23°49'38"S 45°25'15"W, 03/10/1986, leg. Rosana Rocha; DZUP STY 29, iron structures, Cabelo Gordo de Dentro Beach, São Sebastião, 23°49'38"S 45°25'15"W, 20/07/1995, leg. Rosana Rocha; DZUP STY 21, Palmas Island, Santos 24°00'30.28"S 46°19'26.32"W, 08/11/1995, leg. Rosana Rocha; DZUP STY 30, Ilha das Cabras, São Sebastião 23°49'49"S 45°23'35"W, 16/02/1997, leg. Rosana Rocha; DZUP Botd-17, Yatch Club, Ilha Bela, 23°46'27"S 45°21'20"W, 11/12/2009, leg. Rosana Rocha; DZUP Botd-15, Botd-16, Botd-19, Pontal da Cruz pier, São Sebastião 23°46'53"S 45°23'46"W, 12/12/2009, leg. Oliveira Filho, R.R.;

Santa Catarina: DZUP Botd-02, Botd-03, Botd-04 Armação de Itapocorói Beach, Penha, mussel culture, 26°46' 48"S 48°36'44" W, 16/12/2004, leg. Laura Kremer; DZUP Botd-56, Botd-57, Botd-58, Botd-59, Botd-60, Botd-61, Botd-62, Botd-63, Botd-64, Botd-65, Botd-66, Botd-67, Botd-68, Botd-69 Ribeirão da Ilha, Florianópolis, oyster culture, 27°44'08"S 48°33'52"W, 04/09/2006, leg. Rosana Rocha; DZUP Botd-81, Botd-82, Botd-83 Armação de Itapocorói Beach, Penha, mussel culture, 26°46' S 48°36'18" W, 22/09/2006, leg. Rosana Rocha; DZUP Botd-35, Botd-36, Botd-37 Ribeirão da Ilha, Florianópolis, oyster culture, 27°44'08"S 48°33'52"W, 22/05/2013, leg. Rosana Rocha; DZUP Botd-85 de Cima Beach, Palhoça 27°52'56" S 48°34'40" W, 21/08/2013, leg. Rosana Rocha; DZUP Botd-86 Pier, Porto Belo 27°09'12,48"S 48°32'42,10"W, 14/02/2017, leg. Rosana Rocha;

Ecuador, Galápagos: DZUP Botd-72, Botd-73, Botd-74, Botd-75, Botd-76 Navy floating dock and caged panels hanging from it, Baltra Island, 28/04/2016, 0°27'14"S 90°15'57"W, leg. Gretchen Lambert.

United States, California: DZUP Botd-32, Botd-33 Shelter Island, San Diego, 32°42'N 117°14'W, 22/12/2012, leg. Beth Sheets;

Australia: DZUP Botd-101-1004, Bandy Creek Harbour, Esperance, Western Australia, 33°49'48"S 121°56'09"E, 5/11/2014, leg. Matt Hewitt; P1-AU, Hillarys Boat Harbour (Jetty Z), Perth, Western Australia, 31°49'19"S 115°44'20"E, 26/6/2014, leg. Julieta Muñoz.

### List of *Botrylloides perspicuus* samples studied morphologically:

- Papua New Guinea: Brooker Channel, 11°03'5.4" S 152°28'37.2" E, 01/06/1998, 7 m, slides: S1-2362, OCDN 5804-S; S1-2364, OCDN 5804-S; Lusiades 11°03'5.4"S 152°28'37.2" E, 12 m, CRCHO 264, coll. CRRF; slides of the National Muséum d'Histoire Naturelle, Paris: S1-2526, CRCHO 506; S1-2361, CRCHO 302; S1-2536, PNG, CRCHO 558; S1-2535, PNG, CRCHO 556; Port Moresby, Basilisk passage, 9°32.32'S 147°08.04'E, 28 m, OCDN1769, MNHN S1 BOT B 108;
- Philippines: QM GH448, Apo Reef Is, Mindanao, 6°58'00"N 125°16'00"E, 18.2 m, 28/4/1980, coll. M. E. Cowan; QM GH464, Eastern Reef, Apo Island 14°37'N 120°58'E, 9.1 m, 9/5/1980, coll. M. E. Cowan; QM GH524, Mactan Is, Cebu, 10°16'N 123°58'E, 7.5 m, 1/4/1980, coll. M. E. Cowan; QM GH530, Bolinao, Luzon, 16°23'N 119°54'E, 14/2/1980, coll. M. E. Cowan;
- Malaysia, Sarawak, 5°39'36"N 112°27'00"E, 9/04/2013, 10 m, coll. CRRF OM9I 5620 S, Slide: S1-2551, OM9I – 5620S (National Muséum d'Histoire Naturelle, Paris);
- Indonesia: North Sulawesi, west of Manado, 1°27.08'N 124°44.59'E, 20 m, OCDN1296S, MNHN S1 BOT B 109;
- Australia: QM G335105, QM G335101, QM G335110 Kings Beach, Caloundra, Queensland, 26°48'11"S 153°8'46"E, 1 m, 26/5/2014, coll. Merrick Ekins; QM G335062 Kings Beach, Caloundra, Queensland, 26°48'11"S 153°8'46"E, 1 m, 22/7/2013, coll. Merrick Ekins; QM G315124 Inner Gneerings, Sunshine Coast, Queensland, 26°38'47"S 153°9'32", 10 m, 15/10/1998, coll. J. N. A. Hooper, S. D. Cook, J. A. Kennedy, and G. Wörheide; QM G321433 The Pines, Moreton Island, Queensland, 27°5'42"S 153°21'57"E, 13.8 m, 14/9/2004, coll. Merrick Ekins; QM G321314 Wreck of the Scottish Prince, Gold Coast, Queensland, 27°57'42"S 153°26'6"E, 13 m, 28/7/2004, coll. Merrick Ekins; QM G302913, Lord Mayor Shoal, north west of Western Australia, 16°31'12"S 122°36'25"E, 20 m, 13/8/1991, coll. Ron McCauley.
- Hong Kong: QM GH224 (= QM GH3527) East Nine Pins, Hong Kong, 22° 26' N 114° 5' E, 6 m, 20/4/1980, coll. Ivan Goodbody and Patricia Kott;

### References

- Brunetti R, Mastrototaro F (2012) *Botrylloides pizoni*, a new species of Botryllinae (Ascidacea) from Mediterranean Sea. Zootaxa 3258:28-36
