# Supplementary material
Source: publisher figshare collection journal article supplement (https://tandf.figshare.com/articles/dataset/_/9777914)
Supplement: Supplementary file 1 [file 2 › tsab_a_1649738_sm4569.xlsx]

## Sheet: TableS1
Supplementary Table S1
Additional information on the specimens analyzed in this study at both morphological and molecular level (sampling depth, support substratum, geographic coordinates, collector, etc).
Bold: Specimens used in Table 3 as representatives of sp.A1 and sp.A2
N° colonies	Museum Voucher or sample name (a)	Original Identifier	Initial morphological assignment	Final morphological assignment	Molecular assignment	COI Acc. Num.	COI bp	Used Primers	Collector	Locality	Geographic coordinates	Sampling Date	Preservation	Depth (m)	Notes
1	VI-IT	F. Mastrototaro	B. pizoni	B. giganteus	B. giganteus	HF548554	1548	from the entire mtDNA	F. Mastrototaro	Taranto Gulf, Ionian Sea, Italy	40°29'11"N 17°17'42"E	2011-09-12	99% ethanol and 10% formalin	2-3	Violet color
1	RE-IT	F. Mastrototaro	B. pizoni	B. giganteus	B. giganteus	updated HF922626	844	dinF/Nux1R	F. Mastrototaro	Taranto Gulf, Ionian Sea, Italy	40°29'11"N 17°17'42"E	2011-09-12	99% ethanol and 10% formalin	2-3	Red color
1	PE-CA	G. Lambert	B. perspicuus	B. giganteus	B. giganteus	HG931922	1548	from the entire mtDNA	B. Tracy	Harbour Island, San Diego Bay, Pacific Ocean, California, USA	32°43'31"N 117°12'01"W	2012-06-05	99% ethanol and 10% formalin	-	-
1	18-BR	R. M. Rocha	B. giganteus	B. giganteus	B. giganteus	LS992547 (b)	850	dinF/Nux1R	R. M. Rocha	Ribeirão da Ilha, Florianópolis Santa Catarina, Brazil	27°44'08” S 48°33' 52” W	2013-05-02	96% ethanol and 10% formalin	1-3	Orange color
1	44-BR	R. M. Rocha	B. giganteus	B. giganteus	B. giganteus	LS992548 (b)	844	dinF/Nux1R, then nested with cat1F/ux1R	R. M. Rocha	Ribeirão da Ilha, Florianópolis Santa Catarina, Brazil	27°44'08” S 48°33' 52” W	2013-05-02	96% ethanol and 10% formalin	1-3	Brown color
6	E1-AU	J. Muñoz	Botrylloides sp	B. giganteus	B. giganteus	LS992542 (b)	844	dinF/Nux1R	M. Hewitt	Bandy Creek Harbour, Esperance, Western Australia	33°49'48"S 121°56'09"E	13/5/2014 and 5/11/2014	99% ethanol and 10% formalin	1	-
2	P1-AU	J. Muñoz	Botrylloides sp	B. giganteus	B. giganteus	LS992543 (b)	821	dinF/Nux1R	M. Hewitt	Hillarys Boat Harbour (Jetty Z), Perth, Western Australia	31°49'19"S 115°44'20"E	2014-06-26	99% ethanol and 10% formalin	-	-
3	F-NZ (MITS 70884, 70885 and 70886) (c)	M. Page	Botrylloides sp	B. giganteus	B. giganteus	LS992549 (b)	658	LCO1490/HCO2198 (d)	C. Middleton	Marsden Cove Marina, Whangarei, New Zealand	35° 50.227'S 174° 28.298'E	2014-03-16	99% ethanol and 10% formalin	3	-
4	4-GAL	G. Lambert	B. giganteus	B. giganteus	B. giganteus	LS992544 (b)	591	Tun_Forward/Tun_Reverse2 (d)	G. Lambert	Baltra Island, Galapagos	0°27'14”S 90°15'57”W	2016-04-28	99% ethanol and 10% formalin	-	Navy floating dock and caged panels hanging from it. Purple and red color
1	QM G335062	M. Ekins	B. perspicuus	B. perspicuus	sp.A2	LS992551 (b)	844	dinF/Nux1R	M. Ekins	Kings Beach, Caloundra, Queensland, Australia	26° 48' 11.46" S 153° 8' 48.24" E	22/7/2013	99% ethanol	0-1.0; Intertidal	Rocky headland
1	QM G335101	M. Ekins	B. perspicuus	B. perspicuus	sp.A2	LS992551 (b)	844	dinF/Nux1R	M. Ekins	Kings Beach, Caloundra, Queensland, Australia	26° 48' 11.46" S 153° 8' 48.24" E	26/5/2014	99% ethanol	0-1.0; Intertidal	Rocky headland
1	QM G335105	M. Ekins	B. perspicuus	B. perspicuus	sp.A2	LS992551 (b)	844	dinF/Nux1R, then nested with cat1F/ux1R	M. Ekins	Kings Beach, Caloundra, Queensland, Australia	26° 48' 11.46" S 153° 8' 48.24" E	26/5/2014	99% ethanol	0-1.0; Intertidal	Rocky headland
1	QM G335110	M. Ekins	B. perspicuus	B. perspicuus	sp.A2	LS992551 (b)	844	dinF/Nux1R, then nested with cat1F/ux1R	M. Ekins	Kings Beach, Caloundra, Queensland, Australia	26° 48' 11.46" S 153° 8' 48.24" E	26/5/2014	99% ethanol	0-1.0; Intertidal	Rocky headland
1	QM G335088	M. Ekins	B. perspicuus	Botrylloides conchyliatus sp. nov.	sp.A1	LS992552 (b)	827	dinF/Nux1R	M. Ekins	Flinders Reef North of Moreton Island, Queensland, Australia	26° 58' 39.688" S 153° 29' 4.279" E	23/5/2014	99% ethanol	2-15	Reef. Same locality, depth and external characteristics of G313625
1	QM G335090	M. Ekins	B. perspicuus	Botrylloides conchyliatus sp. nov.	sp.A1	LS992552 (b)	827	dinF/Nux1R	M. Ekins	Flinders Reef North of Moreton Island, Queensland, Australia	26° 58' 39.688" S 153° 29' 4.279" E	23/5/2014	99% ethanol	2-15	Reef. Same locality, depth and external characteristics of G313625
1	QM G335091	M. Ekins	B. perspicuus	Botrylloides conchyliatus sp. nov.	sp.A1	LS992552 (b)	827	dinF/Nux1R	M. Ekins	Flinders Reef North of Moreton Island, Queensland, Australia	26° 58' 39.688" S 153° 29' 4.279" E	23/5/2014	99% ethanol	2-15	Reef. Same locality, depth and external characteristics of G313625
1	QM G335092	M. Ekins	B. perspicuus	Botrylloides conchyliatus sp. nov.	sp.A1	LS992552 (b)	827	dinF/Nux1R, then nested with cat1F/ux1R	M. Ekins	Flinders Reef North of Moreton Island, Queensland, Australia	26° 58' 39.688" S 153° 29' 4.279" E	23/5/2014	99% ethanol	2-15	Reef. Same locality of G313625
1	QM G313625	P. Kott	B. perspicuus	Botrylloides conchyliatus sp. nov.	sp.A1	LS992550 (b)	827	dinF/Nux1R, then nested with cat1F/ux1R	S. Cook	Flinders Reef North of Moreton Island, Queensland, Australia	26° 58' 43.322" S 153° 29' 1.827" E	5/12/1997	Frozen and then transferred to 70% ethanol	13.7	Rock and coral reef.
1	QM G315124	P. Kott	B. perspicuus	B. perspicuus	sp.A2	LS992551 (b)	844	dinF/Nux1R, then nested with cat1F/ux1R	J. Hooper	Inner Gneerings, Sunchine Coast, Queensland, Australia	26° 38' 46.98" S 153° 9' 31.893" E	15/10/1998	Frozen and then transferred to 70% ethanol	10	Rocky Reef
1	QM G321433	S. List-Armitage	B. perspicuus	B. perspicuus	sp.A2	LS992551 (b)	844	dinF/Nux1R, then nested with cat1F/ux1R	M. Ekins	The Pines, Moreton Bay, Queensland, Australia	27° 5' 41.64" S 153° 21' 57.261" E	14/9/2004	Frozen and then transferred to 70% ethanol	4-13.8	Coffee Rock; mammillatus type morphology
1	QM G302913	R. McCauley	B. perspicuus	B. perspicuus	sp.A2	LS992551 (b)	844	dinF/Nux1R, then nested with cat1F/ux1R	R. McCauley	Lord Mayor Shoal, North West of Western Australia	16° 31' 12" S 122° 36' 25.2" E	13/8/1991	Frozen and then transferred to 70% ethanol	20	Coarse sand with rock ridges; mammillatus type morphology
1	QM G321314	S. List-Armitage	B. perspicuus	B. perspicuus	sp.A2	LS992551 (b)	844	dinF/Nux1R	M. Ekins	Gold Coast, Queensland, Australia	27° 57' 42.54" S 153° 26' 5.88" E	28/7/2004	99% ethanol	12.5-13	Wreck of the Sottish Prince
(a) Names beginning with “QM” refer to specimens of the Queensland Museum, South Brisbane, Australia
(b) This study
(c) Samples deposited at the NIWA, Marine Invasives Taxonomic Collection, Greta Point, Wellington, NZ, with the following ID numbers: MITS 70884, 70885 and 70886. MITS: Marine Invasives Taxonomic Service
(d) The primer pairs dinF/Nux1R and cat1F/ux1R were not tested on these samples
