# Supplementary material
Source: publisher figshare collection journal article supplement (https://tandf.figshare.com/articles/dataset/_/9777914)
Supplement: Supplementary file 1 [file 2 › tsab_a_1649738_sm4572.pdf]

**Supplementary Table S2**

Conspecific COI sequence included in the “aln97” alignment and used in the ABGD analyses.

| Acc. num. | Species                       | Isolate/haplotype/<br>voucher | Comments |
|-----------|-------------------------------|-------------------------------|----------|
| FJ528645  | <i>Botrylloides leachii</i>   | 53                            |          |
| KY235403  | <i>Botrylloides leachii</i>   | SA5S-1                        |          |
| KY235402  | <i>Botrylloides leachii</i>   | AB3TR                         |          |
| KY235401  | <i>Botrylloides leachii</i>   | AB6MS                         |          |
| KY235400  | <i>Botrylloides leachii</i>   | AB23B                         |          |
| KF309644  | <i>Botrylloides leachii</i>   | SCR-4                         |          |
| KF309642  | <i>Botrylloides leachii</i>   | SCR-2                         |          |
| KF309641  | <i>Botrylloides leachii</i>   | SCR-1                         |          |
| KF309611  | <i>Botrylloides leachii</i>   | MP-6                          |          |
| KF309610  | <i>Botrylloides leachii</i>   | MP-5                          |          |
| KF309609  | <i>Botrylloides leachii</i>   | MP-4                          |          |
| KF309608  | <i>Botrylloides leachii</i>   | MP-2                          |          |
| KF309551  | <i>Botrylloides leachii</i>   | AR-5                          |          |
| KF309549  | <i>Botrylloides leachii</i>   | AR-2                          |          |
| KU711789  | <i>Botrylloides niger</i>     | HI19                          |          |
| KU711782  | <i>Botrylloides niger</i>     | IRAR2                         |          |
| KU711787  | <i>Botrylloides niger</i>     | BZ1                           |          |
| KU711784  | <i>Botrylloides niger</i>     | PR12                          |          |
| KU711788  | <i>Botrylloides niger</i>     | VZ6                           |          |
| KU711785  | <i>Botrylloides niger</i>     | PR11                          |          |
| KU711783  | <i>Botrylloides niger</i>     | IRC30                         |          |
| KU711786  | <i>Botrylloides niger</i>     | MXA05                         |          |
| FJ528644  | <i>Botrylloides violaceus</i> | 67                            |          |
| GU220388  | <i>Botrylloides violaceus</i> | Bv7                           |          |
| GQ365695  | <i>Botrylloides violaceus</i> | Bv5                           |          |
| GQ365691  | <i>Botrylloides violaceus</i> | Bv1                           |          |
| GU220387  | <i>Botrylloides violaceus</i> | Bv6                           |          |
| GQ365694  | <i>Botrylloides violaceus</i> | Bv4                           |          |
| GQ365693  | <i>Botrylloides violaceus</i> | Bv3                           |          |
| GQ365692  | <i>Botrylloides violaceus</i> | Bv2                           |          |
| GU065355  | <i>Botrylloides violaceus</i> | 27 from Canada                |          |
| KY235405  | <i>Botrylloides violaceus</i> | SCM11R-2                      |          |
| KY235407  | <i>Botrylloides violaceus</i> | SW1                           |          |
| GU946476  | <i>Botrylloides violaceus</i> | Bv8                           |          |
| GU946477  | <i>Botrylloides violaceus</i> | Bv9                           |          |
| GU946479  | <i>Botrylloides violaceus</i> | Bv11                          |          |
| GU946478  | <i>Botrylloides violaceus</i> | Bv10                          |          |
| KY235406  | <i>Botrylloides violaceus</i> | MM4-3                         |          |
| KU695284  | <i>Botrylloides violaceus</i> | F3S6                          |          |
| KU695285  | <i>Botrylloides violaceus</i> | F3S9                          |          |
| KU695286  | <i>Botrylloides violaceus</i> | F3S10                         |          |

| Acc. num. | Species              | Isolate/haplotype/<br>voucher | Comments                    |
|-----------|----------------------|-------------------------------|-----------------------------|
| KX138502  | Botrylloides niger   | DBTIC129                      | anomalous seq, not analyzed |
| KX650766  | Botrylloides niger   | DBTIC146                      | anomalous seq, not analyzed |
| KX138503  | Botrylloides niger   | DBTIC130                      | anomalous seq, not analyzed |
| KP254541  | Botrylloides niger   | FTP_0791                      | anomalous seq, not analyzed |
| KT693198  | Botrylloides niger   | DBTIC58                       | anomalous seq, not analyzed |
| KT693200  | Botrylloides niger   | DBTIC60                       | anomalous seq, not analyzed |
| KT693201  | Botrylloides niger   | DBTIC61                       | anomalous seq, not analyzed |
| KT693199  | Botrylloides niger   | DBTIC59                       | anomalous seq, not analyzed |
| AY116601  | Botryllus schlosseri | ST                            | Clade D                     |
| JN248372  | Botryllus schlosseri | Bs31                          | Clade D                     |
| DQ223768  | Botryllus schlosseri | HC - BS31CAI                  | Clade E                     |
| DQ340206  | Botryllus schlosseri | HE                            | Clade E                     |
| DQ340209  | Botryllus schlosseri | HH                            | Clade E                     |
| DQ340215  | Botryllus schlosseri | HN                            | Clade E                     |
| DQ340220  | Botryllus schlosseri | HW                            | Clade E                     |
| GQ365706  | Botryllus schlosseri | Bs11                          | Clade E                     |
| GQ365707  | Botryllus schlosseri | Bs12                          | Clade E                     |
| JN248359  | Botryllus schlosseri | Bs18                          | Clade E                     |
| JN248360  | Botryllus schlosseri | Bs19                          | Clade E                     |
| JN248361  | Botryllus schlosseri | Bs20                          | Clade E                     |
| JN248362  | Botryllus schlosseri | Bs21                          | Clade E                     |
| JN248373  | Botryllus schlosseri | Bs32                          | Clade E                     |
| JN248374  | Botryllus schlosseri | Bs33                          | Clade E                     |
| JN248375  | Botryllus schlosseri | Bs34                          | Clade E                     |
| JN248376  | Botryllus schlosseri | Bs35                          | Clade E                     |
| KJ680129  | Botryllus schlosseri | Bs38                          | Clade E                     |
| KF309545  | Botryllus schlosseri | AM14                          | Clade E                     |
| KX500914  | Botryllus schlosseri | Bs57 - BsSA6                  | Clade E                     |
| KX500876  | Botryllus schlosseri | Bs56 - BsGI21                 | Clade E                     |
| KX500875  | Botryllus schlosseri | Bs61 - BsTQ22                 | Clade E                     |
| KX500850  | Botryllus schlosseri | Bs59 - BsPO1                  | Clade E                     |
| KX500836  | Botryllus schlosseri | Bs60 - BsPO4                  | Clade E                     |
| KX500834  | Botryllus schlosseri | Bs58 Plymouth19               | Clade E                     |
| FJ528642  | Botryllus schlosseri | i45                           | Clade C                     |
| DQ340214  | Botryllus schlosseri | HM                            | Clade C                     |
| DQ340218  | Botryllus schlosseri | HT                            | Clade C                     |
