# Supplementary material
Source: publisher figshare collection journal article supplement (https://tandf.figshare.com/articles/dataset/_/9777914)
Supplement: Supplementary file 1 [file 2 › tsab_a_1649738_sm4577.pdf]

**Supplementary Table S3** Comparison of morphological characteristics among populations of *Botrylloides giganteus* and *B. perspicuus*. Detailed information about the samples can be found in the Supplement File S1.

|                                           | Source                         | Colony                                                                      | Oral tentacles | Atrial siphon                                                                           | Pharynx                                                                                                          | Stomach/caecum                                                      | Alimentary canal                                            | Anus                                              | Oocytes                                     | Testis                                      | Larva                                                    |
|-------------------------------------------|--------------------------------|-----------------------------------------------------------------------------|----------------|-----------------------------------------------------------------------------------------|------------------------------------------------------------------------------------------------------------------|---------------------------------------------------------------------|-------------------------------------------------------------|---------------------------------------------------|---------------------------------------------|---------------------------------------------|----------------------------------------------------------|
| <i>B. giganteus</i>                       |                                |                                                                             |                |                                                                                         |                                                                                                                  |                                                                     |                                                             |                                                   |                                             |                                             |                                                          |
| <i>B. giganteum</i> (Pérès, 1949) Senegal | Original description           | 15 cm diameter, 1.5 cm thickness, dark or reddish brown, meandering systems | 16, 4 sizes    | Circular, small, level of 1-6 <sup>th</sup> row of stigamta                             | 18-19 rows, 11-12 stigmata per half row, formula: DL3/2/2/5En                                                    | 11-12 folds, caecum short                                           |                                                             | At 15 <sup>th</sup> row of stigmata               | 1 each side, dorsal and posterior to testis | 12-15 follicles, elongated in larger zooids | --                                                       |
| <i>B. giganteus</i> Senegal               | Permanent slide Coll IFAN # 63 | --                                                                          | --             | Circular, small, large band of circular musculature                                     | 17 (?) rows, transverse and longitudinal musculature, the last one dorsal, with oblique fibres in the last third | 11 folds, oblique, 2 most ventral are longer, caecum short and thin | Vertical, posterior to thorax, ascendant intestine enlarged | Bilobed, mid thorax                               | 1 each side, posterior to testis            | 9-10 follicles, elongate or oblong          | Trunk 0.6 mm, 7 long ampullae, central statocyte         |
| <i>B. giganteus</i> Senegal               | Permanent slide Coll IFAN # 16 | --                                                                          | 8, 12          | Circular, small at the level of 3-4 <sup>th</sup> row of stigmata                       | 14 - 19 rows, 12 stigmata per half row, similar musculature to slide 63                                          | 10, oblique, 2 most ventral are longer, caecum short but dilated    | Vertical, posterior to thorax, ascendant intestine enlarged | Bilobed, between 9– 11 <sup>th</sup> row stigmata | 1 each side, posterior to testis            | 8-9 follicles, elongate or oblong           | Trunk 0.55 mm, 7 long ampullae, central statocyte        |
| <i>B. giganteus</i> Senegal               | Permanent slide Coll IFAN # 61 | --                                                                          | 30             | Circular, small at the level of 3-5 <sup>th</sup> and 3-7 <sup>th</sup> row of stigmata | 14 - 17 rows, 12 stigmata per half row, similar musculature to slide 63                                          | 10, oblique, 2 most ventral are longer, caecum short but dilated    | Vertical, posterior to thorax, ascendant intestine enlarged | Bilobed, 10 <sup>th</sup> row stigmata            | --                                          | --                                          | Trunk 0.6 mm, 6-8 ampulla, central statocyte or anterior |

|                                                     | Source                                                         | Colony                                                                                                               | Oral tentacles                               | Atrial siphon                                               | Pharynx                                                                                                                                 | Stomach/caecum                                 | Alimentary canal                                                          | Anus                                                                        | Oocytes                                            | Testis                                            | Larva                                                           |
|-----------------------------------------------------|----------------------------------------------------------------|----------------------------------------------------------------------------------------------------------------------|----------------------------------------------|-------------------------------------------------------------|-----------------------------------------------------------------------------------------------------------------------------------------|------------------------------------------------|---------------------------------------------------------------------------|-----------------------------------------------------------------------------|----------------------------------------------------|---------------------------------------------------|-----------------------------------------------------------------|
| <i>B. giganteus</i><br>Espírito Santo, Brazil<br>17 | Preserved colony and permanent slides                          | 3-5 cm diam., 0.5-1.5 cm thickness, dark brown or red, meandering systems or crowded zooids                          | 20-28, 4 sizes                               | Small, level of 2-8 <sup>th</sup> row of stigmata           | 14 - 15 rows, 11-12 stigmata per half row, formula: DL4-5/2/2/3En, similar musculature to slide 63                                      | 9, oblique, caecum short and slightly dilated, | vertical, posterior to thorax, ascendent intestine not enlarged           | Bilobed, 9 <sup>th</sup> row stigmata                                       | --                                                 | 8-9 follicles, elongated and ramified or circular | Trunk 0.5 mm, 8 ampullae, central statocyte                     |
| <i>B. giganteus</i><br>Rio de Janeiro, Brazil       | Preserved colony and permanent slide<br><br>sty2.74            | 5 mm thick, violet brown colonies, meandering systems                                                                | 18, 3 sizes                                  | Small, open, at the level 1-7 <sup>th</sup> row of stigmata | 15 (?) rows, transverse and longitudinal musculature (dorsal and conspicuous)                                                           | 9-10, caecum short and slightly dilated        | Vertical or horizontal, posterior to thorax, ascendent intestine enlarged | Bilobed, right anterior to the level of testis                              | 1 embryo each side, posterior or lateral to testis | 5-11 follicles, elongate and irregular            | --                                                              |
| <i>B. giganteus</i><br>São Paulo<br>Brazil          | Preserved colony and permanent slide<br><br>sty2.4<br>sty 2.91 |                                                                                                                      | 15, 3 sizes (bud)<br><br>21, 3 sizes (zooid) | Small, open at the level 1-3 <sup>th</sup> row of stigmata  | 12-16 rows, 10-12 stigmata per half row, Formula: D2,2,2,4DL4-5,2,2,3L transverse and longitudinal musculature (dorsal and conspicuous) | 9-10, caecum short and dilated                 | Vertical, posterior to thorax, ascendent intestine enlarged               | At 7-11 <sup>th</sup> row of stigmata; but at 12 <sup>th</sup> row in a bud | 1 embryo each side, posterior to testis            | 5-8 follicles, elongated                          | Trunk 0.45 mm. 4 pairs of elongated ampullae, central statocyte |
| <i>B. giganteus</i><br>Santa Catarina<br>Brazil     | Preserved colony and permanent slide<br><br>sty 2.76 e 2.75    | Up to 10 cm diam. 5 – 1.5 cm thick, red, orange, dark brown, dark brown or red, meandering systems or crowded zooids | 18, 3 sizes                                  | Small, open at the level 1-5 <sup>th</sup> row of stigmata  | 15 (?) rows, transverse and longitudinal musculature (dorsal and conspicuous)                                                           | 10, caecum short not dilated                   | Vertical, posterior to thorax, ascendent intestine enlarged               | Bilobed, 10 <sup>th</sup> row stigmata                                      | --                                                 | 9-10 follicles, elongate or oblong                | --                                                              |

|                                                                    | Source                                                   | Colony                                                         | Oral tentacles | Atrial siphon                                              | Pharynx                                                                          | Stomach/caecum                             | Alimentary canal                                                                                                                                                 | Anus                                                                                                | Oocytes                          | Testis                                 | Larva                               |
|--------------------------------------------------------------------|----------------------------------------------------------|----------------------------------------------------------------|----------------|------------------------------------------------------------|----------------------------------------------------------------------------------|--------------------------------------------|------------------------------------------------------------------------------------------------------------------------------------------------------------------|-----------------------------------------------------------------------------------------------------|----------------------------------|----------------------------------------|-------------------------------------|
| <i>B giganteus</i><br>4-Gal,<br>Galapagos                          | Preserved colony and permanent slide                     | 3 x 4 cm diam., 0.5 – 0.7mm thick, crowded zooids              |                | Small, open at the level 1-8 <sup>th</sup> row of stigmata | 14 rows, transverse and longitudinal musculature (dorsal and conspicuous)        | 9-10, caecum short and curved, not dilated | Vertical, posterior to thorax, ascendent intestine enlarged                                                                                                      | Bilobed, 11 <sup>th</sup> row stigmata                                                              | 1 each side, posterior to testis | 5-16 follicles, elongate or oblong     | --                                  |
| <i>B giganteus</i><br>California                                   | Preserved colony and permanent slides                    | 0.3 mm thick,                                                  | 16-18, 3 sizes | Small, open at the level 2-6 <sup>th</sup> row of stigmata | 17-18 rows, branchial formula DL 4-5,3,3.4-5 R or DL 5, 2-3,2-3,4 L              | 10, caecum short, not dilated              | Vertical, posterior to thorax, ascendent intestine enlarged                                                                                                      | Bilobed, 10-12 <sup>th</sup> row stigmata                                                           | --                               | --                                     | --                                  |
| <i>B giganteus</i><br>E1-AU,<br>Esperance,<br>Western<br>Australia | Preserved colony and permanent slide, DZUP Botd-101-1004 | Small pieces of 2 x 1 cm                                       | 20, 3 sizes    | Small, open at the level 2-9 <sup>th</sup> row of stigmata | 17-23 rows, formula: L4,3,3,5DL                                                  | 10 folds, small caecum                     | Vertical, posterior to thorax, ascendent intestine enlarged                                                                                                      | Smooth, bilobed, 17 <sup>th</sup> row in a bud,                                                     | 1 each side, posterior to testis | 22 round in bud, 12 elongated in zooid | Trunk 0.45 mm, 4 pairs of ampullae, |
| <i>B giganteus</i><br>P1-AU, Perth,<br>Western<br>Australia        | Preserved colony                                         | Two small pieces of 4 x 2 cm and 2 x 1 cm, 1 cm thick each one | 18-20, 3 sizes | Small, open at the level 1-6 <sup>th</sup> row of stigmata | 17-20 rows, 13-15 stigmata per half-row, transverse and longitudinal musculature | 11 folds, small caecum                     | Vertical, posterior to thorax, ascendent intestine enlarged, anus opening smooth edged or bilobed, placed at the level of about 10 <sup>th</sup> row of stigmata | Smooth edged, bilobed when closed, placed at the level of about 10-12 <sup>th</sup> row of stigmata |                                  |                                        |                                     |

|                                                                 | Source                   | Colony                                                                                                       | Oral tentacles | Atrial siphon                                              | Pharynx                                                                                                                                          | Stomach/caecum                                                  | Alimentary canal                                                                          | Anus                                                       | Oocytes                          | Testis                                                           | Larva                                                |
|-----------------------------------------------------------------|--------------------------|--------------------------------------------------------------------------------------------------------------|----------------|------------------------------------------------------------|--------------------------------------------------------------------------------------------------------------------------------------------------|-----------------------------------------------------------------|-------------------------------------------------------------------------------------------|------------------------------------------------------------|----------------------------------|------------------------------------------------------------------|------------------------------------------------------|
| <i>B. pizoni</i><br>Brunetti & Mastrototaro, 2012               | Original description     | Several cms in diam., 2-3 cm thickness, Lilac to violet, orange and red, meandering system or crowded zooids | 30, 3 sizes    | Small, open at the level 1-5 <sup>th</sup> row of stigmata | 17 rows, 13-15 stigmata per half row, branchial formula L 4,2,2,5 DL 6,2,2,5 R, transverse and longitudinal musculature (dorsal and conspicuous) | 11 folds, small caecum                                          | Vertical, posterior to thorax, ascendent intestine enlarged                               | Smooth, bilobed when closed, 14 <sup>th</sup> row stigmata | 1 each side, posterior to testis | 10 elongated follicles                                           | Trunk 0.6 mm, 4 pairs of ampullae, central statocyte |
| <b><i>B. perspicuus</i></b>                                     |                          |                                                                                                              |                |                                                            |                                                                                                                                                  |                                                                 |                                                                                           |                                                            |                                  |                                                                  |                                                      |
| <i>B. firmus</i><br>Monniot & Monniot, 1996<br>Papua New Guinea | Original description     | Thick (11 mm), gold yellow or black and yellow, meandering systems                                           | 12, 3 sizes    | wide                                                       | 16-18 rows, 18-20 stigmata per half row                                                                                                          | 12 folds                                                        | Horizontal, posterior to thorax, second loop closed and over the stomach, short rectum    | Opens just anterior to the esophagus opening               | Only in second order buds        | More developed in first order buds                               | --                                                   |
| <i>B. perspicuum</i><br>(Herdman, 1886)<br>Philippines          | Original description     | 4 cm diam. by 4 mm thick, spaces without zooids, light brown with a tinge of purple                          | 8, 2 sizes     | --                                                         | 13-14 rows, 10-12 stigmata per half row, with transverse musculature.                                                                            | 10 folds, triangular shape.                                     | Horizontal, posterior to thorax, intestine slightly overlaps stomach.                     | Opens just anterior to the esophagus opening               | --                               | --                                                               | --                                                   |
| <i>B. perspicuus</i><br>Papua New Guinea                        | S1-2362,PNG, OCDN 5804-S |                                                                                                              | 8, 2 sizes     | Wide, exposing from 2 <sup>nd</sup> - 7 <sup>th</sup> row  | 14-16 rows, 11-12 stigmata per half row, transverse and longitudinal musculature (dorsal NOT evident)                                            | 8 folds, short stomach, caecum very posterior, slightly dilated | Horizontal, ascendant intestine very short and with an angle, intestine overlaps stomach. | Bilobed, between 14 - 15 <sup>th</sup> row                 | --                               | 9-12 follicles elongated or triangular, testis round protruding. | --                                                   |

|                                          | Source                   | Colony                                                                                                                            | Oral tentacles | Atrial siphon                                                      | Pharynx                                                                                       | Stomach/caecum                                                                                                              | Alimentary canal                                                                          | Anus                                                                 | Oocytes | Testis                                | Larva |
|------------------------------------------|--------------------------|-----------------------------------------------------------------------------------------------------------------------------------|----------------|--------------------------------------------------------------------|-----------------------------------------------------------------------------------------------|-----------------------------------------------------------------------------------------------------------------------------|-------------------------------------------------------------------------------------------|----------------------------------------------------------------------|---------|---------------------------------------|-------|
| <i>B. perspicuus</i><br>Papua New Guinea | S1-2364,PNG, OCDN 5804-S |                                                                                                                                   | 8 short        | Wide, exposing from 5 - 12 <sup>th</sup> row                       | 18 rows, 14 stigmata in half row. Longitudinal dorsal musculature not visible                 | 8 folds, caecum very posterior, slightly dilated – vessel linking with intestine                                            | Horizontal, ascendant intestine very short and with an angle, intestine overlaps stomach. | Rectum very short, anus between 14 - 15 <sup>th</sup> rows           | --      | 12 follicles elongated or triangular, | --    |
| <i>B. perspicuus</i><br>Papua New Guinea | S1-2536,PNG, CRCHO 558,  |                                                                                                                                   | 8 short        | Wide, exposing all pharynx                                         | 14 rows, 14 stigmata in half row. Longitudinal dorsal musculature present but not conspicuous | 8 folds,                                                                                                                    | Horizontal, ascendant intestine very short and with an angle, intestine overlaps stomach. | Rectum very short, anus between 11 - 12 <sup>th</sup> rows           | --      |                                       | --    |
| <i>B. perspicuus</i><br>Papua New Guinea | S1-2535,PNG, CRCHO 556,  |                                                                                                                                   | 8              | Wide, exposing all pharynx                                         | --                                                                                            | 8 folds,                                                                                                                    | Horizontal, ascendant intestine very short and with an angle, intestine overlaps stomach. | Rectum very short anus between 11 - 12 <sup>th</sup> row             | --      | --                                    | --    |
| <i>B. perspicuus</i> ,<br>Philippines    | QM GH448                 | Light brown zooids with opaque raised areas between the systems when fixed <2mm in height, meandering pairs, 1.8-2.0 mm in length | 8, 2 sizes     | small when contracted, but most likely exposes most of the pharynx | 14 rows                                                                                       | Truncated trumpet shaped ,10-12 folds presenting large ovoid swelling at cardiac end, small posterior nipple pyloric caecum | Horizontal, ascendant intestine, overlaps stomach.                                        | Rectum very short. Anus opens just anterior to the esophagus opening | --      | --                                    | --    |

|                                    | Source   | Colony                                                                                                                                           | Oral tentacles | Atrial siphon                      | Pharynx                             | Stomach/caecum                                                                                             | Alimentary canal                                  | Anus                                              | Oocytes | Testis                                 | Larva |
|------------------------------------|----------|--------------------------------------------------------------------------------------------------------------------------------------------------|----------------|------------------------------------|-------------------------------------|------------------------------------------------------------------------------------------------------------|---------------------------------------------------|---------------------------------------------------|---------|----------------------------------------|-------|
| <i>B. perspicuus</i> , Philippines | QM GH464 | Maroon zooids with opaque raised areas between the systems when fixed, 3-8 mm thick, zooids in meandering pairs, 2-2.5 mm in length              | 8, 2 sizes     | Wide, exposing all pharynx         | 14 rows, 17 stigmata per half row   | Truncated trumpet shaped, 10-12 folds presenting large ovoid swelling at cardiac end, small pyloric caecum | Horizontal, ascendant intestine, overlaps stomach | Rectum very short                                 | --      | --                                     | --    |
| <i>B. perspicuus</i> , Philippines | QM GH524 | Light brown zooids with opaque raised areas between the systems when fixed, 2-3 mm thick, with dense meandering pairs 1.6-2.3 mm in length       | 8, 2 sizes     | Wide, exposing most of the pharynx | 12-14 rows, 12-14 stigmata per side | Truncated trumpet shaped, 10-12 folds presenting large ovoid swelling at cardiac end, small pyloric caecum | Horizontal, ascendant intestine, overlaps stomach | Anus opens just anterior to the esophagus opening | --      | 8 follicles enlarged, embryo posterior | --    |
| <i>B. perspicuus</i> , Philippines | QM GH530 | Maroon zooids with opaque areas between the systems when fixed, 2-3 mm thick, with dense meandering pairs of contracted zooids, 1.5 mm in length | 8, 2 sizes     | Wide, exposing most of the pharynx | 14 rows 14-16 stigmata per side     | Truncated trumpet shaped, 10+ folds presenting large ovoid swelling at cardiac end, small pyloric caecum   | Horizontal, ascendant intestine, overlaps stomach | --                                                | --      | 8 follicles enlarged, embryo posterior | --    |

|                                   | Source                      | Colony                                                                                                                                                                                                                                              | Oral tentacles | Atrial siphon                                               | Pharynx                                                    | Stomach/caecum                                                                                                                              | Alimentary canal                                                                                            | Anus                                                                    | Oocytes        | Testis | Larva                                      |
|-----------------------------------|-----------------------------|-----------------------------------------------------------------------------------------------------------------------------------------------------------------------------------------------------------------------------------------------------|----------------|-------------------------------------------------------------|------------------------------------------------------------|---------------------------------------------------------------------------------------------------------------------------------------------|-------------------------------------------------------------------------------------------------------------|-------------------------------------------------------------------------|----------------|--------|--------------------------------------------|
| <i>B. perspicuus</i><br>Malaysia  | S1-2551,<br>OM9I -<br>5620S |                                                                                                                                                                                                                                                     | --             | Wide,<br>exposing 2 <sup>nd</sup> -<br>10 <sup>th</sup> row | 14 - 15 rows                                               | --                                                                                                                                          | Horizontal,<br>ascendent<br>intestine very<br>short and with an<br>angle, intestine<br>overlaps<br>stomach. | Rectum<br>seem a<br>little<br>longer<br>than in the<br>other<br>samples | 1 each<br>side | --     | 0.55 mm, do<br>not seem very<br>developed, |
| <i>B. perspicuus</i><br>Australia | QM<br>G335105               | Bright orange<br>when alive, tan<br>zooids with<br>opaque areas<br>between the<br>system when<br>fixed,<br>membranous 1-<br>5 mm thick,<br>tightly<br>compacted<br>double ladders<br>forming<br>elongated<br>systems. Zooids<br>2-3 mm in<br>length | 8, 2 sizes     | Wide,<br>exposing<br>most of the<br>pharynx                 | 10 - 11 rows, 12<br>stigmata per side.<br>E:3-4:2-4:2:3-4. | Truncated<br>trumpet<br>shaped 10<br>folds<br>presenting<br>large ovoid<br>swelling at<br>cardiac end,<br>small curved<br>pyloric<br>caecum | Horizontal,<br>ascendant<br>intestine,<br>overlaps stomach                                                  | Anus<br>opens just<br>anterior to<br>the<br>esophagus<br>opening        | --             | --     | --                                         |

|                                   | Source        | Colony                                                                                                                                                                                                                                          | Oral tentacles | Atrial siphon                      | Pharynx       | Stomach/caecum                                                                                                | Alimentary canal                                  | Anus                                              | Oocytes | Testis | Larva |
|-----------------------------------|---------------|-------------------------------------------------------------------------------------------------------------------------------------------------------------------------------------------------------------------------------------------------|----------------|------------------------------------|---------------|---------------------------------------------------------------------------------------------------------------|---------------------------------------------------|---------------------------------------------------|---------|--------|-------|
| <i>B. perspicuus</i><br>Australia | QM<br>G335101 | Bright orange when alive, tan zooids with opaque raised areas between the system when fixed, membranous 1-5 mm thick, tightly compacted double ladders forming elongated systems. Zooids 2-3 mm in length                                       | 8, 2 sizes     | Wide, exposing most of the pharynx | 10 - 11 rows, | Truncated trumpet shaped 10 folds presenting large ovoid swelling at cardiac end                              | Horizontal, ascendant intestine, overlaps stomach | Anus opens just anterior to the esophagus opening | --      | --     | --    |
| <i>B. perspicuus</i><br>Australia | QM<br>G335110 | Bright orange when alive with transparent areas free of zooids, tan zooids with raised opaque areas between the system when fixed, membranous 2-3 mm thick, tightly compacted double ladders forming elongated systems. Zooids 1.7 mm in length | 8, 2 sizes     | Wide, exposing most of the pharynx | 10 - 13 rows, | Truncated trumpet shaped 10 folds presenting large ovoid swelling at cardiac end, small curved pyloric caecum | Horizontal, ascendant intestine, overlaps stomach | Anus opens just anterior to the esophagus opening | --      | --     | --    |

|                                   | Source        | Colony                                                                                                                                                                                                                         | Oral tentacles | Atrial siphon                      | Pharynx                                | Stomach/caecum                                                                                                | Alimentary canal                                  | Anus                                              | Oocytes | Testis | Larva |
|-----------------------------------|---------------|--------------------------------------------------------------------------------------------------------------------------------------------------------------------------------------------------------------------------------|----------------|------------------------------------|----------------------------------------|---------------------------------------------------------------------------------------------------------------|---------------------------------------------------|---------------------------------------------------|---------|--------|-------|
| <i>B. perspicuus</i><br>Australia | QM<br>G335062 | Dull pink when alive with transparent areas free of zooids, tan zooids with opaque raised areas between the system when fixed, 3 mm thick, tightly compacted double ladders forming elongated systems. Zooids 1.7 mm in length | 8, 2 sizes     | Wide, exposing most of the pharynx | 12 rows, 12 stigmata per half row      | Truncated trumpet shaped 10 folds presenting large ovoid swelling at cardiac end, small curved pyloric caecum | Horizontal, ascendant intestine, overlaps stomach | Anus opens just anterior to the esophagus opening | --      | --     | --    |
| <i>B. perspicuus</i><br>Australia | QM<br>G315124 | Dull red colony with red opaque raised areas between the system when fixed, thick and encrusting 4-10 mm thick, tightly compacted. Zooids circular to large ellipsoidal systems, zooids 1.5-1.9 mm in length                   | 4              | Wide, exposing most of the pharynx | 13 rows, 14 per half row, DL:4:3:3:4:E | Truncated trumpet shaped 10 folds presenting large ovoid swelling at cardiac end, large pyloric caecum        | Horizontal, ascendant intestine, overlaps stomach | Anus opens just anterior to the esophagus opening | --      | --     | --    |

|                                   | Source        | Colony                                                                                                                                                                                                                                     | Oral tentacles | Atrial siphon | Pharynx                                | Stomach/caecum                                                                                              | Alimentary canal                                  | Anus                                              | Oocytes | Testis | Larva |
|-----------------------------------|---------------|--------------------------------------------------------------------------------------------------------------------------------------------------------------------------------------------------------------------------------------------|----------------|---------------|----------------------------------------|-------------------------------------------------------------------------------------------------------------|---------------------------------------------------|---------------------------------------------------|---------|--------|-------|
| <i>B. perspicuus</i><br>Australia | QM<br>G321433 | Opaque raised areas between the gold coloured system when fixed, the zooids become tan to purple coloured, thick and encrusting 3-5 mm thick, tightly compacted. Zooids circular to large ellipsoidal systems, zooids 1.5-1.8 mm in length | 8. 2 sizes     | --            | 13 rows, 12 per half row, E:5:2:2:3:DL | Truncated trumpet shaped 10 folds presenting large ovoid swelling at cardiac end, large pyloric caecum      | Horizontal, ascendant intestine, overlaps stomach | Anus opens just anterior to the esophagus opening | --      | --     | --    |
| <i>B. perspicuus</i><br>Australia | QM<br>G321314 | Bright orange zooids when alive, fading to tan zooids in transparent test when fixed, thin and encrusting 2mm thick. Zooids meandering pairs, zooids 1.5-1.7 mm in length contracted                                                       | --             | --            | 11 rows                                | Truncated trumpet shaped 10 folds presenting large ovoid swelling at cardiac end, very small pyloric caecum | Horizontal, ascendant intestine, overlaps stomach | Anus opens just anterior to the esophagus opening | --      | --     | --    |

|                                   | Source                         | Colony                                                                                                                                                                      | Oral tentacles | Atrial siphon                      | Pharynx                                      | Stomach/caecum                                                                                               | Alimentary canal                                  | Anus                                                         | Oocytes | Testis                                 | Larva |
|-----------------------------------|--------------------------------|-----------------------------------------------------------------------------------------------------------------------------------------------------------------------------|----------------|------------------------------------|----------------------------------------------|--------------------------------------------------------------------------------------------------------------|---------------------------------------------------|--------------------------------------------------------------|---------|----------------------------------------|-------|
| <i>B. perspicuus</i><br>Australia | QM G302913                     | Brown colony with yellow zooids in meandering ladders, fading to tan zooids with opaque raised areas between the system when fixed, 5 mm thick. Zooids 1.7-2.0 mm in length | --             | Wide, exposing most of the pharynx | 18 rows                                      | Truncated trumpet shaped 8-9 folds presenting large ovoid swelling at cardiac end, very small pyloric caecum | Horizontal, ascendant intestine, overlaps stomach | Anus opens just anterior to the esophagus opening            | --      | 8 follicles enlarged, embryo posterior | --    |
| <i>B. perspicuus</i><br>Hong Kong | QM GH224, Kott & Goodbody 1982 | Entire colony is maroon with the zooids slightly more orange. Zooids 2.5-2.8 mm in length in parallel rows                                                                  | 8              | Wide, exposing most of the pharynx | 10-14 rows, 17 stigmata per row E:4:3:3:7:DL | Taper or conical 9 folds presenting large ovoid swelling at cardiac end, very small pyloric caecum           | Horizontal, ascendant intestine, overlaps stomach | Anus simple, bilobed and opens between 7-9 <sup>th</sup> row | --      | 8 follicles enlarged, embryo posterior | --    |

## References

- Brunetti R, Mastrototaro F (2012) *Botrylloides pizoni*, a new species of Botryllinae (Ascidacea) from Mediterranean Sea. Zootaxa 3258:28-36
- Herdman WA (1886) Report on the Tunicata collected during the Voyage of H.M.S. 'Challenger' during the years 1873-76. II. Ascidiae compositae. In: Thompson CW and Murray J (eds) Report on the scientific results of the Voyage of H.M.S. 'Challenger' during the years 1873-76. pp. 429
- Kott P, Goodbody I (1982) Ascidians of Hong Kong. In: Morton B (ed) Proceedings of the first international marine biological workshop: The Marine Flora and Fauna of Hong Kong and Southern China. Hong Kong University Press, Hong Kong, pp. 503-554
- Monniot F, Monniot C (1996) New collections of ascidians from the Western Pacific and Southeastern Asia. Micronesica 29:133-279
- Pérès JM (1949) Contribution à l'étude des Ascidies de la Côte occidentale d'Afrique. Bull de l'Inst français d'Afrique noire 11:159-207
