# Supplementary material
Source: publisher figshare collection journal article supplement (https://tandf.figshare.com/articles/dataset/_/9777914)

(a)

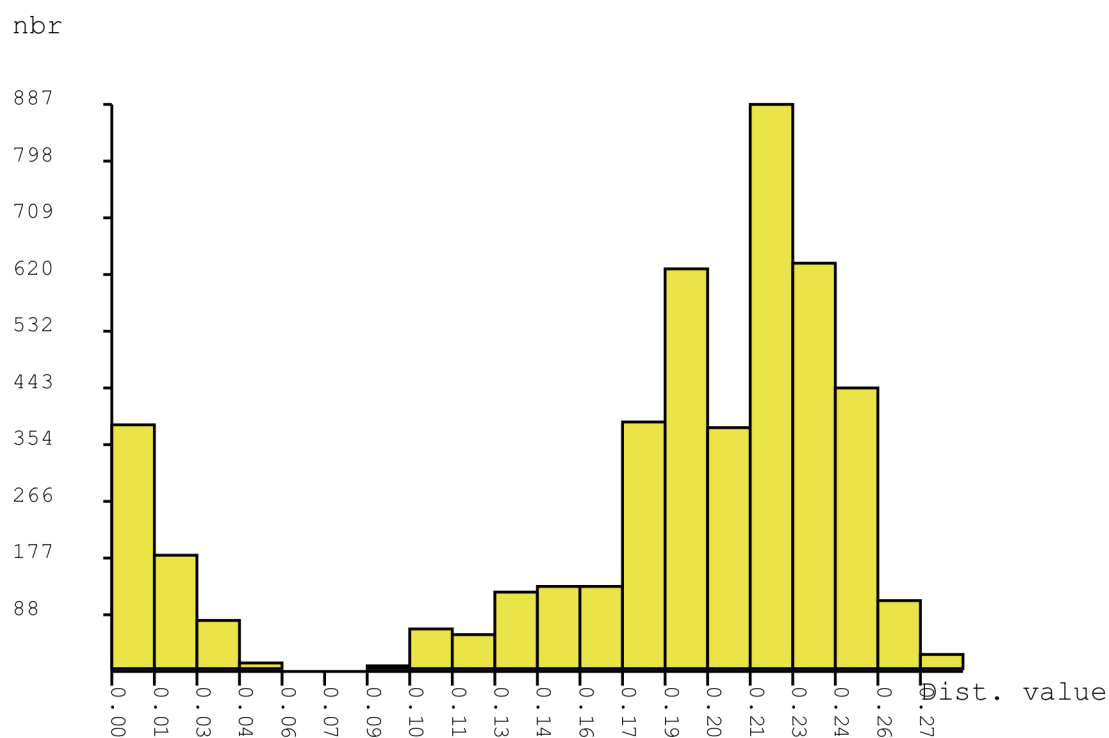

(b)

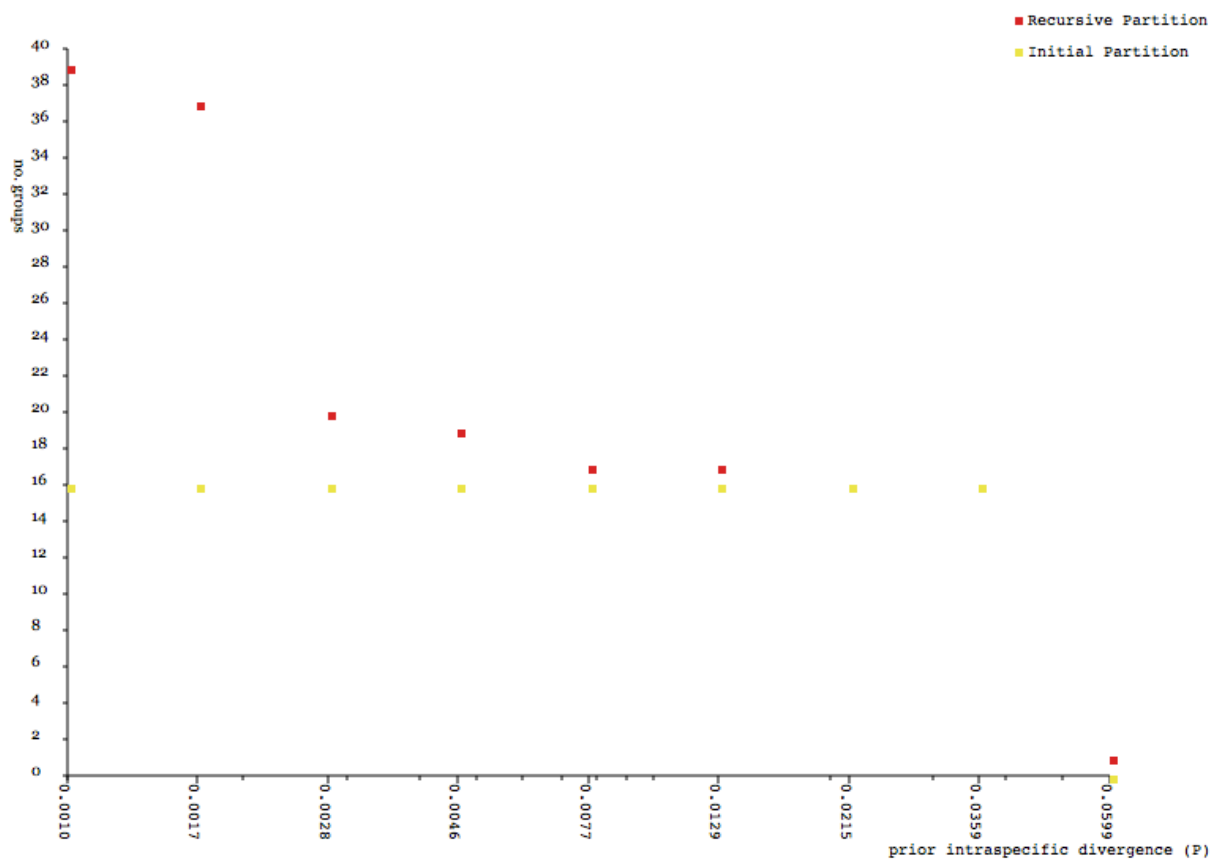

Supplement: Supplementary file 1 [file 2 › tsab_a_1649738_sm0129.pdf]
